# Supplementary material for: Perceptions of the quality of generic medicines: implications for trust in public services within the local health system in Tumkur, India
Source: PubMed Central journal article supplement — BMJ Glob Health. 2018 Jan 13;2(Suppl 3):e000644. doi: 10.1136/bmjgh-2017-000644 (PMC5844374; doi:10.1136/bmjgh-2017-000644), 2018-01-13
Supplement: bmjgh-2017-000644supp001.pdf [file bmjgh-2017-000644supp001.pdf]

## Supplementary file 1

The medicine tests were conducted using the standardized IP 2014 protocol and for a few specific samples using IP 2010 with addendum 2012. Based on the drug property of some medicines, certain tests were not performed.

Supplementary file table 1: Comparative quality evaluation of Tablet Metformin(Metformin Hydrochloride IP 500 mg) sampled from different sources from private and government laboratories

| Quality parameters                                      | Sample Source                |               |                             |               |                                    |               |                                   |               |                                   |               |          |
|---------------------------------------------------------|------------------------------|---------------|-----------------------------|---------------|------------------------------------|---------------|-----------------------------------|---------------|-----------------------------------|---------------|----------|
|                                                         | Government District Hospital |               | Private pharmacy: Most sold |               | Private pharmacy : Least expensive |               | Janatha bazar: Branded drug store |               | Janathabazar : Generic drug store |               |          |
|                                                         | Private                      | Govt          | Private                     | Govt          | Private                            | Govt          | Private                           | Govt          | Private                           | Govt          |          |
| A) Identification                                       |                              |               |                             |               |                                    |               |                                   |               |                                   |               |          |
| 1                                                       | Complies                     | Complies      | Complies                    | Complies      | Complies                           | Complies      | Complies                          | Complies      | Complies                          | Complies      |          |
| 2                                                       | Complies                     |               | Complies                    |               | Complies                           |               | Complies                          |               | Complies                          |               | Complies |
| 3                                                       | Complies                     |               | Complies                    |               | Complies                           |               | Complies                          |               | Complies                          |               | Complies |
| B) Uniformity of the weight                             | Within limits                | Within limits | Within limits               | Within limits | Within limits                      | Within limits | Within limits                     | Within limits | Within limits                     | Within limits |          |
| C) Dissolution in percentage ( by UV-Not less than 75%) |                              |               |                             |               |                                    |               |                                   |               |                                   |               |          |
| 1                                                       | 92.03                        | N/A           | 88.51                       | N/A           | 79.21                              | N/A           | 89.59                             | N/A           | 89.26                             | N/A           |          |
| 2                                                       | 91.00                        | N/A           | 85.00                       | N/A           | 88.49                              | N/A           | 82.64                             | N/A           | 91.53                             | N/A           |          |
| 3                                                       | 90.13                        | N/A           | 82.85                       | N/A           | 86.56                              | N/A           | 80.36                             | N/A           | 81.80                             | N/A           |          |
| 4                                                       | 88.84                        | N/A           | 87.77                       | N/A           | 83.30                              | N/A           | 78.63                             | N/A           | 79.78                             | N/A           |          |
| 5                                                       | 86.52                        | N/A           | 84.05                       | N/A           | 81.12                              | N/A           | 85.17                             | N/A           | 79.34                             | N/A           |          |
| 6                                                       | 84.42                        | N/A           | 86.16                       | N/A           | 84.64                              | N/A           | 83.36                             | N/A           | 84.46                             | N/A           |          |
| D) Assay                                                | 96.35                        | 93.12         | 97.28                       | 91.14         | 98.56                              | 96.01         | 98.25                             | 92.32         | 101.53                            | 95.56         |          |

Supplementary file table 2: Comparative quality evaluation of Tablet Glibenclamide (Glibenclamide IP 5 mg) sampled from different sources from private and government laboratories

| Quality parameters                                            | Sample Source                |                 |                             |                 |                                    |                 |                                   |                 |                                   |                 |
|---------------------------------------------------------------|------------------------------|-----------------|-----------------------------|-----------------|------------------------------------|-----------------|-----------------------------------|-----------------|-----------------------------------|-----------------|
|                                                               | Government District Hospital |                 | Private pharmacy: Most sold |                 | Private pharmacy : Least expensive |                 | Janatha bazar: Branded drug store |                 | Janathabazar : Generic drug store |                 |
|                                                               | Private                      | Govt            | Private                     | Govt            | Private                            | Govt            | Private                           | Govt            | Private                           | Govt            |
| A)Identification                                              | Complies                     | Complies        | Complies                    | Complies        | Complies                           | Complies        | Complies                          | Complies        | Complies                          | Complies        |
| B)Average Weight                                              | Complies                     | N/A             | Complies                    | N/A             | Complies                           | N/A             | Complies                          | N/A             | Complies                          | N/A             |
| C)Disintegration test                                         | N/A                          | N/A             | N/A                         | N/A             | N/A                                | N/A             | N/A                               | Passed the test | N/A                               | Passed the test |
| D)Related Substance                                           | N/A                          | Passed the test | N/A                         | Passed the test | N/A                                | Passed the test | N/A                               | Passed the test | N/A                               | Passed the test |
| E) Uniformity of content in percentages (by HPLC* - 85%-115%) |                              |                 |                             |                 |                                    |                 |                                   |                 |                                   |                 |
| 1                                                             | 111.15                       | Complies        | 108.23                      | Complies        | 91.70                              | Complies        | 107.86                            | Complies        | 112.40                            | Complies        |
| 2                                                             | 111.73                       |                 | 111.76                      |                 | 96.27                              |                 | 95.75                             |                 | 107.56                            |                 |
| 3                                                             | 110.74                       |                 | 108.59                      |                 | 109.09                             |                 | 97.85                             |                 | 114.81                            |                 |
| 4                                                             | 113.20                       |                 | 109.48                      |                 | 98.96                              |                 | 110.46                            |                 | 98.44                             |                 |
| 5                                                             | 111.59                       |                 | 114.40                      |                 | 111.12                             |                 | 113.06                            |                 | 97.66                             |                 |
| 6                                                             | 111.66                       |                 | 110.42                      |                 | 108.52                             |                 | 113.26                            |                 | 110.41                            |                 |
| 7                                                             | 112.49                       |                 | 110.44                      |                 | 109.35                             |                 | 110.53                            |                 | 112.06                            |                 |
| 8                                                             | 112.10                       |                 | 107.85                      |                 | 113.84                             |                 | 113.16                            |                 | 110.18                            |                 |
| 9                                                             | 111.87                       |                 | 96.29                       |                 | 110.37                             |                 | 96.05                             |                 | 105.39                            |                 |
| 10                                                            | 99.71                        |                 | 85.85                       |                 | 110.08                             |                 | 111.13                            |                 | 105.30                            |                 |
| F)Assay                                                       | 100.55                       | 91.04           | 102.71                      | 98.80           | 101.40%                            | 102.80          | 102.96                            | 97.40           | 104.09                            | 89.40           |
| G)Disintegration Time                                         | 40 secs                      | N/A             | 55 secs                     | N/A             | 50 secs                            | N/A             | 55 secs                           | N/A             | 50 secs                           | N/A             |

\*HPLC-High Pressure Liquid Chromatography.

\*NA: Test not performed. Result not available.

Supplementary file table 1:: Comparative quality evaluation of Tablet Atenolol (Atenolol IP 50 mg) sampled from different sources from private and government laboratories

| Quality parameters         | Sample source                |                 |                             |                 |                                    |                 |                                   |                 |                                   |                 |
|----------------------------|------------------------------|-----------------|-----------------------------|-----------------|------------------------------------|-----------------|-----------------------------------|-----------------|-----------------------------------|-----------------|
|                            | Government District Hospital |                 | Private pharmacy: Most sold |                 | Private pharmacy : Least expensive |                 | Janatha bazar: Branded drug store |                 | Janathabazar : Generic drug store |                 |
|                            | Private                      | Govt            | Private                     | Govt            | Private                            | Govt            | Private                           | Govt            | Private                           | Govt            |
| A) Identification          |                              |                 |                             |                 |                                    |                 |                                   |                 |                                   |                 |
| A                          | Complies                     | Complies        | Complies                    | Complies        | Complies                           | Complies        | Complies                          | Complies        | Complies                          | Complies        |
| B                          | Complies                     |                 | Complies                    |                 | Complies                           |                 | Complies                          |                 | Complies                          |                 |
| B)Uniformity of the weight | Within limits                | Within limits   | Within limits               | Within limits   | Within limits                      | Within limits   | Within limits                     | Within limits   | Within limits                     | Within limits   |
| C)Disintegration time      | 2 min 05 sec                 | Passed the test | 1 min 50 sec                | Passed the test | 5 min 10 sec                       | Passed the test | 2 min 15 sec                      | Passed the test | 1 min 55 sec                      | Passed the test |
| D) Assay                   | 100.06                       | 96.78           | 102.78                      | 96.78           | 98.56                              | 90.60           | 100.77                            | 96.22           | 104.93%                           | 90.58           |

Supplementary file table 4: Comparative quality evaluation of Tablet Amlodipine Besylate(Amlodipine BesylateIP 5 mg) sampled from different sources from private and government laboratories

| Quality parameters                                      | Sample source                |          |                             |          |                                    |          |                                   |          |                                   |          |
|---------------------------------------------------------|------------------------------|----------|-----------------------------|----------|------------------------------------|----------|-----------------------------------|----------|-----------------------------------|----------|
|                                                         | Government District Hospital |          | Private pharmacy: Most sold |          | Private pharmacy : Least expensive |          | Janatha bazar: Branded drug store |          | Janathabazar : Generic drug store |          |
|                                                         | Private                      | Govt     | Private                     | Govt     | Private                            | Govt     | Private                           | Govt     | Private                           | Govt     |
| A)Identification                                        | Complies                     | Complies | Complies                    | Complies | Complies                           | Complies | Complies                          | Complies | Complies                          | Complies |
| B)Average weight                                        | Complies                     | N/A      | Complies                    | N/A      | Complies                           | N/A      | Complies                          | N/A      | Complies                          | N/A      |
| C) Dissolution in percentage (by UV- Not less than 75%) |                              |          |                             |          |                                    |          |                                   |          |                                   |          |
| 1                                                       | 112.10                       | Passed   | 108.11                      | Passed   | 111.90                             | Passed   | 104.77                            | Passed   | 96.54                             | Passed   |
| 2                                                       | 103.67                       | the test | 102.61                      | the test | 105.58                             | the test | 105.05                            | the test | 98.05                             | the test |
| 3                                                       | 111.85                       |          | 107.50                      |          | 113.48                             |          | 103.55                            |          | 94.39                             |          |
| 4                                                       | 106.85                       |          | 105.05                      |          | 105.83                             |          | 104.55                            |          | 96.46                             |          |
| 5                                                       | 103.34                       |          | 103.14                      |          | 110.92                             |          | 112.34                            |          | 95.89                             |          |
| 6                                                       | 106.44                       |          | 107.54                      |          | 112.67                             |          | 113.12                            |          | 96.34                             |          |
| D)Uniformity of the content                             | Complies                     |          | Passed the test             |          | Complies                           |          | Passed the test                   |          | Complies                          |          |
| E)Assay                                                 | 96.54                        | 106.6    | 107.82                      | 109.6    | 102.40                             | 109.2    | 104.91                            | 108.4    | 93.12                             | 91.4     |
